# Supplementary material for: Kinetics and mechanism of the Co(II)-assisted oxidation of l-ascorbic acid by dioxygen and nitrite in aqueous solution
Source: Royal Society of Chemistry journal article supplement (doi:10.1039/b906478h), 2009-01-01
Supplement: b906478h.pdf [file b906478h.pdf]

## Supporting Information

### Kinetics and Mechanism of the Co(II)-assisted Oxidation of L-Ascorbic Acid by Dioxygen and Nitrite in Aqueous Solution

Elena A. Vlasova, Natalya Hessenauer-Ilicheva, Denis S. Salnikov, Evgeny V. Kudrik,  
Sergei V. Makarov and Rudi van Eldik

#### Legends for Figures

**Figure S1:** Typical kinetic traces recorded for the reaction of complex **I** with L-ascorbic acid at 510 nm. Experimental conditions:  $[I] = 2 \times 10^{-5}$  M,  $[H_2A]_T = 0.28$  mM, 0.1 M acetate buffer (pH 5.8, solid line) and 0.1 M TRIS buffer (pH 7.0, dashed line) at 25 °C.

**Figure S2:** Plots of  $1/k_{obs}$  vs.  $1/[H_2A]_T$  as a function of temperature. Experimental conditions:  $[Co^{II}(L)(H_2O)_2]^{8-} = 2 \times 10^{-5}$  M,  $[H_2A]_T = (0.14 - 1.0)$  mM, 0.1 M acetate buffer (pH = 5.8).

**Figure S3:** Plot of  $k_{obs}$  vs.  $[H_2A]_T$  for the reduction of complex **I** by L-ascorbic acid under anaerobic conditions. Experimental conditions:  $[I] = 2 \times 10^{-5}$  M,  $[H_2A]_T = (0.14 - 1.0)$  mM, 0.1 M acetate buffer (pH = 3.8) at 25 °C.

**Figure S4:** Plot of  $\ln K_4$  versus  $1/T$  for the reaction of complex **I** with ascorbate. Experimental conditions:  $[I] = 2 \times 10^{-5}$  M,  $[H_2A]_T = (0.14 - 1.0)$  mM, 0.1 M acetate buffer (pH = 5.8).

**Figure S5:** Eyring plot for reaction of complex **I** with L-ascorbic acid. Experimental conditions:  $[I] = 2 \times 10^{-5}$  M,  $[H_2A]_T = (0.14 - 1.0)$  mM, 0.1 M acetate buffer (pH = 5.8).

**Figure S6:** Plot of  $\ln k_{obs}$  vs. pressure for the reaction between complex **I** and L-ascorbic acid. Experimental conditions:  $[I] = 2 \times 10^{-5}$  M,  $[H_2A]_T = 0.14$  mM, 0.1 M MES buffer (pH = 5.8) at 25 °C.

**Figure S7:** Plot of  $\ln K$  versus  $1/T$  for the reaction of complex **I** with ascorbate. Experimental conditions:  $[I] = 2 \times 10^{-5}$  M,  $[H_2A]_T = (0.14 - 1.0)$  mM, 0.1 M TRIS buffer (pH = 7.1).

**Figure S8:** Eyring plot for the reaction of complex **I** with ascorbate. Experimental conditions:  $[I] = 2 \times 10^{-5}$  M,  $[H_2A]_T = (0.14 - 1.0)$  mM, 0.1 M TRIS buffer (pH = 7.1).

This journal is © The Royal Society of Chemistry 2009

**Figure S9:** ESR spectrum of the product of the reaction between **I** and L-ascorbic acid under anaerobic conditions. Experimental conditions:  $[\mathbf{I}] = 2.5 \text{ mM}$ ,  $[\text{H}_2\text{A}]_{\text{T}} = 62.5 \text{ mM}$ ,  $0.3 \text{ M TRIS buffer (pH} = 7.4)$  at  $85 \text{ K}$ . The spectrum clearly shows the presence of  $\text{Co}^{\text{II}}$  at  $2660 \text{ G}$  (see J. Krzystek, A. Ozarowski, J. Telser, *Coord. Chem. Rev.*, 2006, **250**, 2308) and L-ascorbic acid signals between  $2750$  and  $3000 \text{ G}$  (see J. T. Masiakowski and A. Lund, *J. Chem. Soc., Faraday Trans.*, 1987, **83**, 1869). The spectrum was recorded using the following parameters: number of scans = 4, center of field =  $3000 \text{ G}$ , sweep width =  $2500 \text{ G}$ , resolution =  $8192$  points, microwave frequency =  $8.9 \text{ GHz}$ , microwave power =  $1 \text{ mW}$ , modulation frequency =  $100 \text{ kHz}$ , modulation amplitude =  $2 \text{ G}$ , time constant =  $100 \text{ ms}$ , and sweep time =  $120 \text{ s}$ .

**Figure S10:** Dependence of the induction period on  $[\text{H}_2\text{A}]_{\text{T}}$ . Experimental conditions:  $[\mathbf{I}^{\text{red}}] = 2 \times 10^{-5} \text{ M}$ ,  $[\text{O}_2] = 0.2 \text{ mM}$ ,  $[\text{H}_2\text{A}]_{\text{T}} = (0.035 - 0.14) \text{ mM}$ ,  $0.1 \text{ M TRIS buffer (pH} = 7.0)$  at  $25 \text{ }^\circ\text{C}$ .

**Figure S11:** Eyring plot for the oxidation of reduced complex **I** by  $\text{O}_2$ . Experimental conditions:  $[\mathbf{I}^{\text{red}}] = 2 \times 10^{-5} \text{ M}$ ,  $[\text{O}_2] = 0.6 \text{ mM}$ ,  $[\text{H}_2\text{A}]_{\text{T}} = 0.035 \text{ mM}$ ,  $0.1 \text{ M TRIS buffer (pH} = 7.0)$ .

**Figure S12:** Plot of  $\ln k_{\text{obs}2}$  vs. pressure for the oxidation of the reduced form of complex **I** by  $\text{O}_2$ . Experimental conditions:  $[\mathbf{I}^{\text{red}}] = 2 \times 10^{-5} \text{ M}$ ,  $[\text{O}_2] = 0.6 \text{ mM}$ ,  $[\text{H}_2\text{A}]_{\text{T}} = 0.035 \text{ mM}$ ,  $0.1 \text{ M TRIS buffer (pH} = 7.0)$  at  $35 \text{ }^\circ\text{C}$ .

**Figure S13:** Spectral changes observed during the oxidation of the reduced form of complex **I** by nitrite. Experimental conditions:  $[\mathbf{I}^{\text{red}}] = 2 \times 10^{-5} \text{ M}$ ,  $[\text{H}_2\text{A}]_{\text{T}} = 0.07 \text{ mM}$ ,  $[\text{NaNO}_2] = 100 \text{ mM}$ ,  $0.1 \text{ M TRIS buffer (pH} = 7.0)$  at  $25 \text{ }^\circ\text{C}$ . Induction period omitted for clarity.

**Figure S14:** Eyring plot for the oxidation of the reduced form of complex **I** by  $\text{NaNO}_2$ . Experimental conditions:  $[\mathbf{I}^{\text{red}}] = 2 \times 10^{-5} \text{ M}$ ,  $[\text{H}_2\text{A}]_{\text{T}} = 0.14 \text{ mM}$ ,  $[\text{NaNO}_2] = 100 \text{ mM}$ ,  $0.1 \text{ M TRIS buffer (pH} = 7.0)$ .

**Figure S15:** Plot of  $\ln k_{\text{obs}3}$  vs. pressure for the oxidation of the reduced form of complex **I** by  $\text{NaNO}_2$ . Experimental conditions:  $[\mathbf{I}^{\text{red}}] = 2 \times 10^{-5} \text{ M}$ ,  $[\text{H}_2\text{A}]_{\text{T}} = 0.14 \text{ mM}$ ,  $[\text{NaNO}_2] = 80 \text{ mM}$ ,  $0.1 \text{ M TRIS buffer (pH} = 7.0)$  at  $35 \text{ }^\circ\text{C}$ .

**Figure S16:**  $^{15}\text{N}$  NMR spectrum recorded following the catalyzed oxidation of L-ascorbic acid by  $\text{Na}^{15}\text{NO}_2$ . Experimental conditions:  $[\mathbf{I}^{\text{red}}] = 2 \text{ mM}$ ,  $[\text{H}_2\text{A}]_{\text{T}} = 0.14 \text{ mM}$ ,  $[\text{NaNO}_2] = 2 \text{ M}$ ,  $99\% \text{ D}_2\text{O}$  at  $25 \text{ }^\circ\text{C}$ .

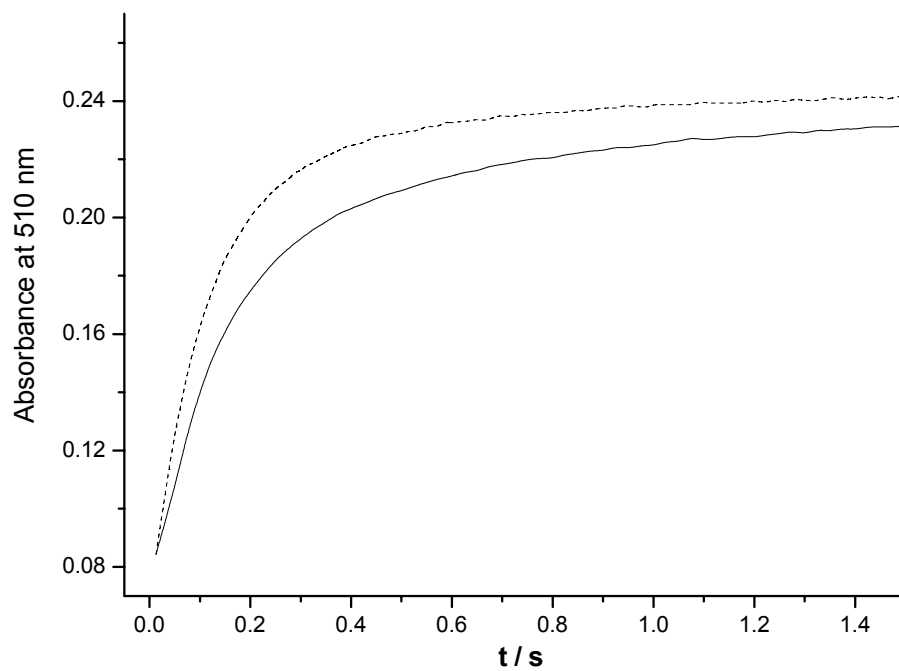

**Figure S1**

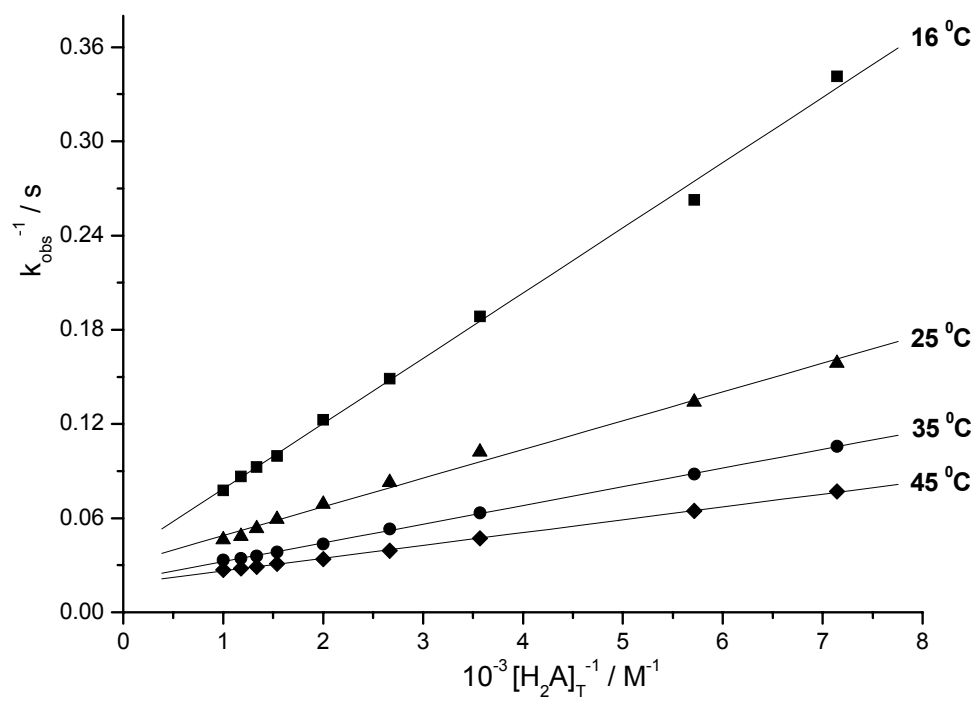

Figure S2

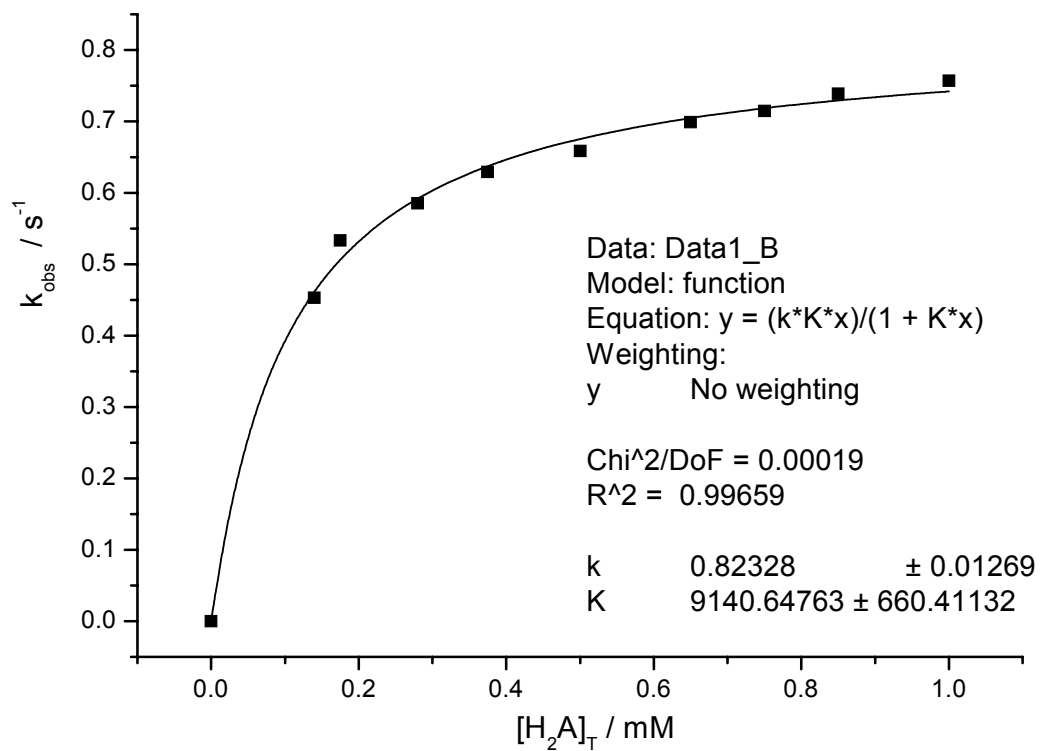

Figure S3

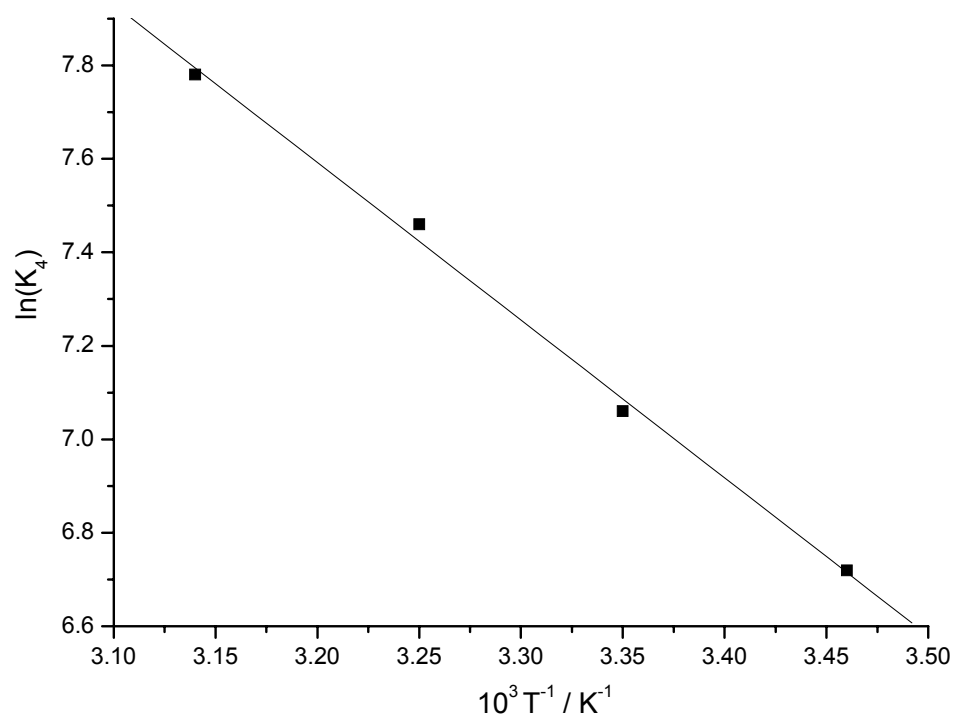

**Figure S4**

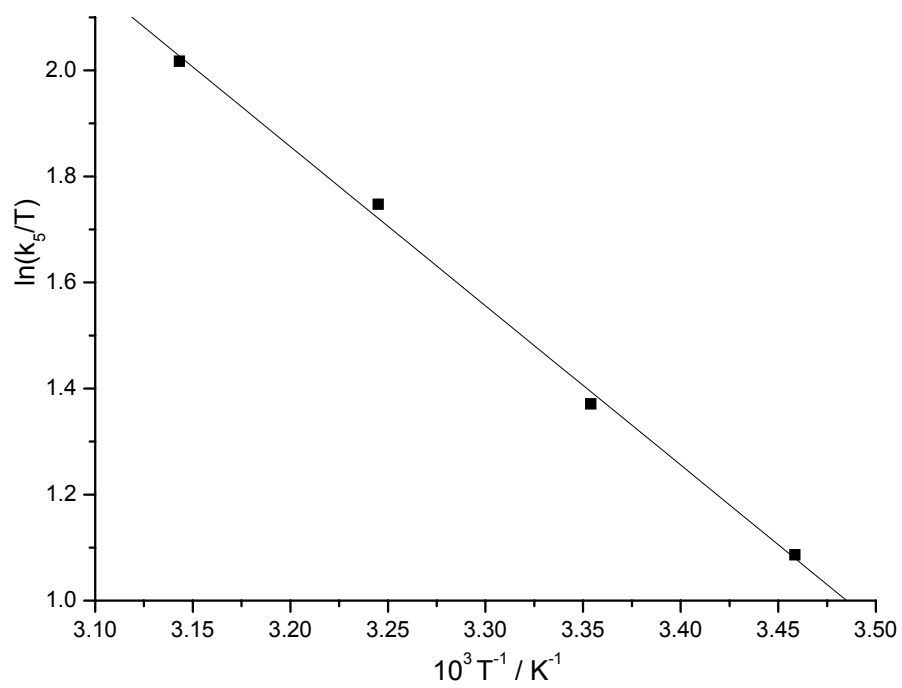

**Figure S5**

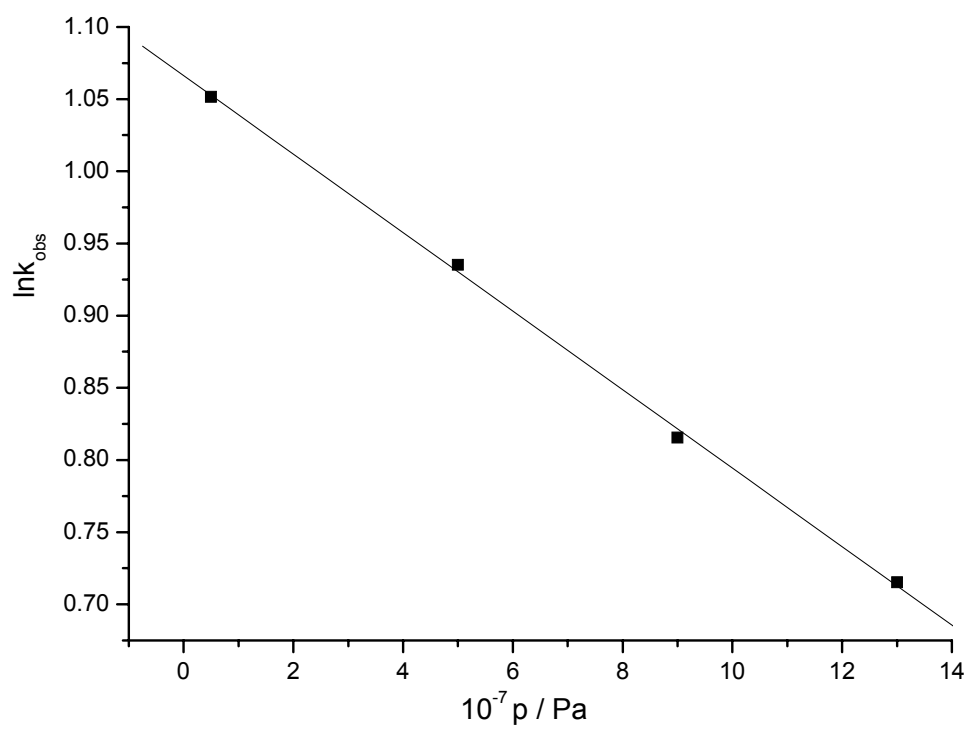

**Figure S6**



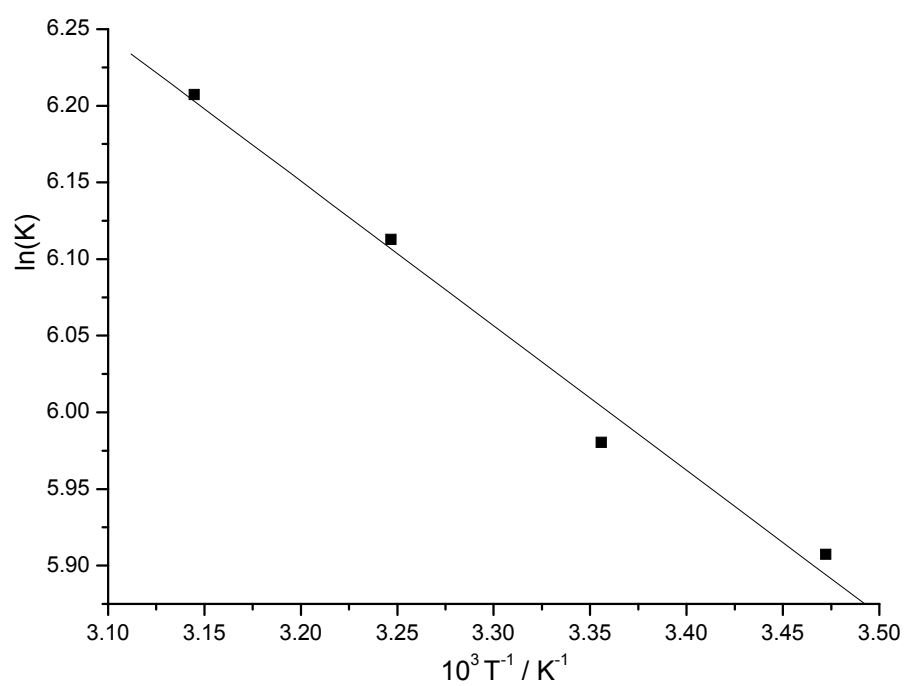

**Figure S7**

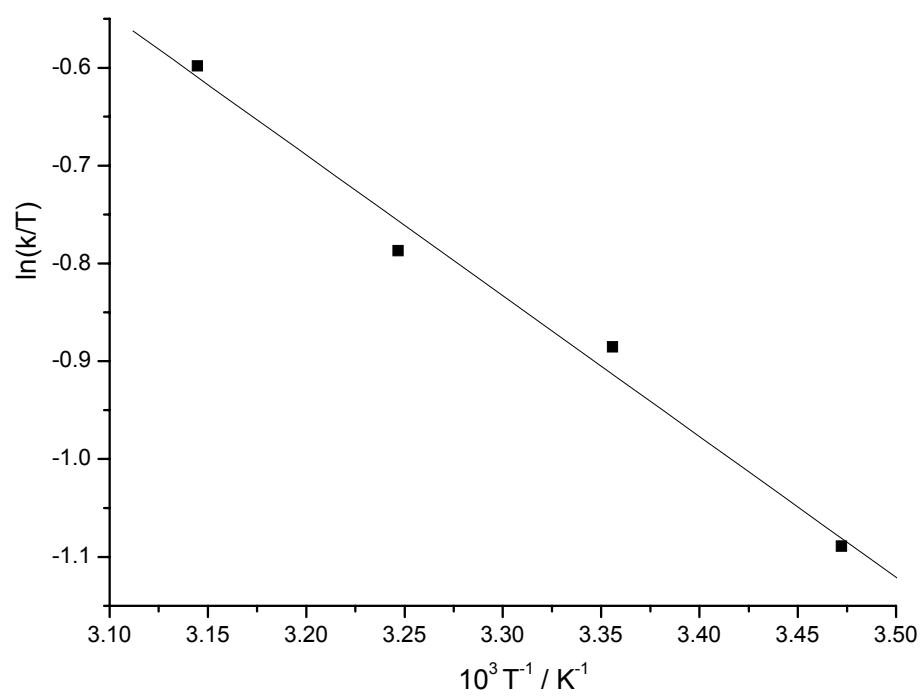

**Figure S8**

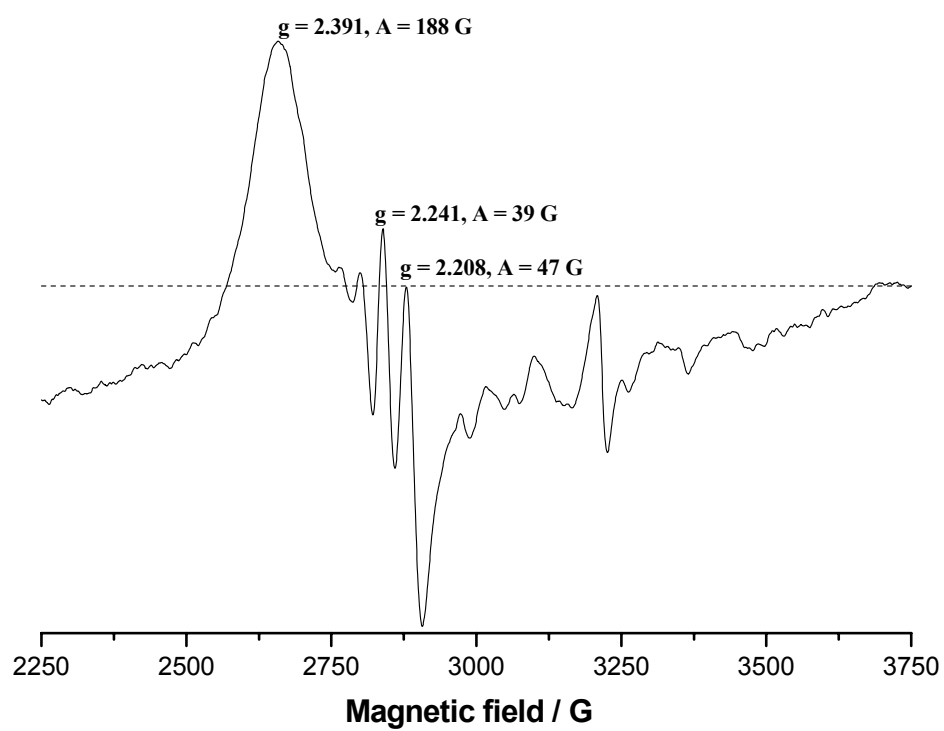

**Figure S9**

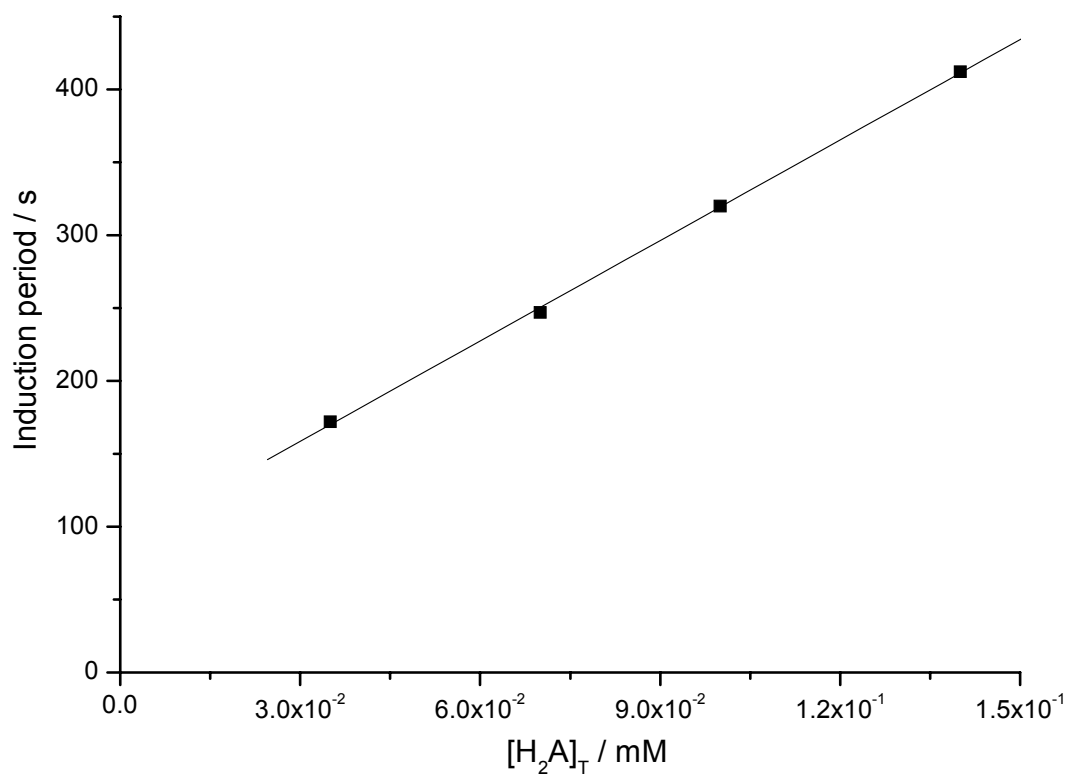

**Figure S10**

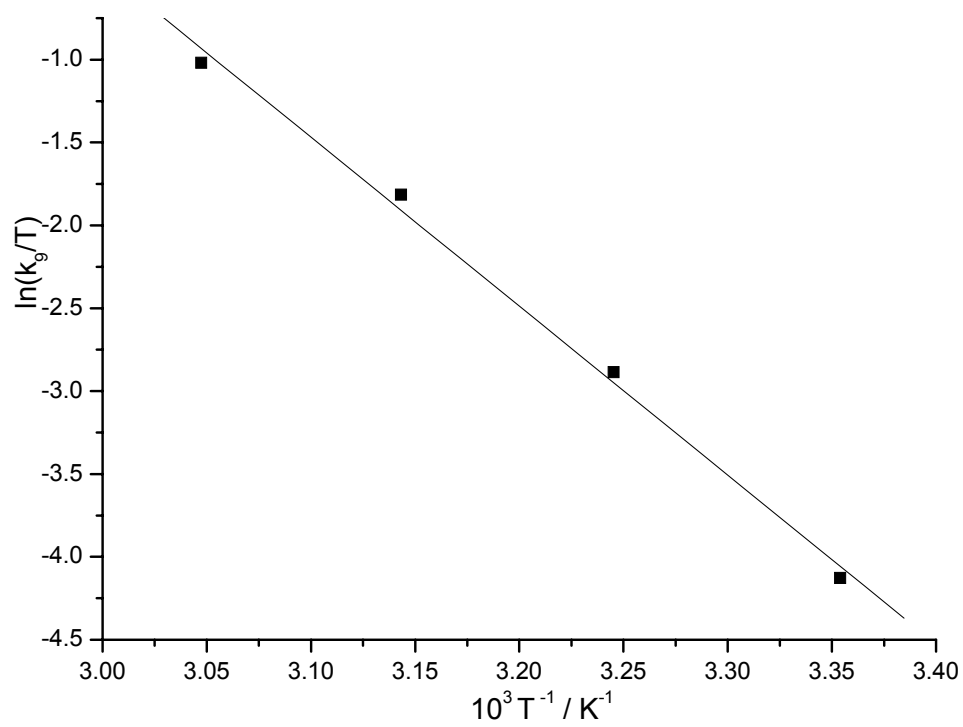

**Figure S11**

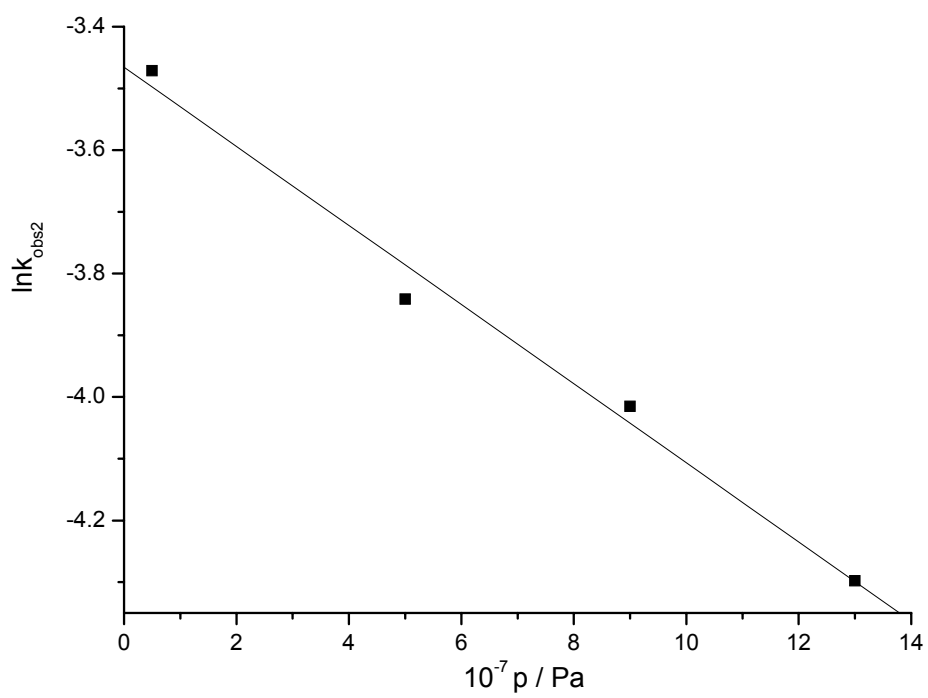

**Figure S12**

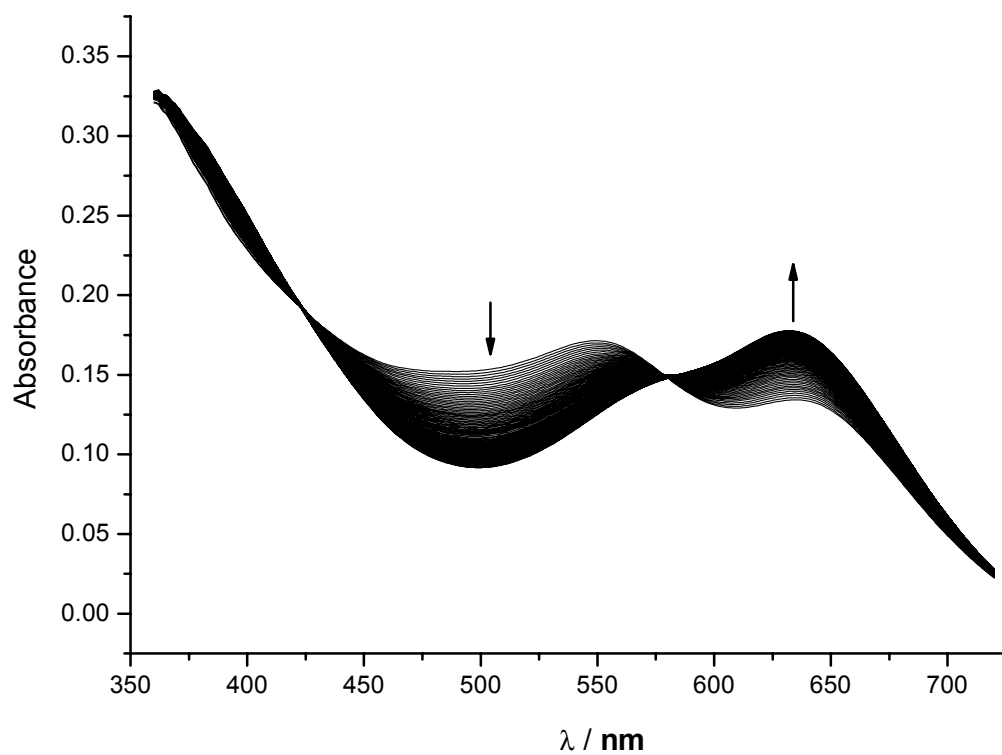

Figure S13

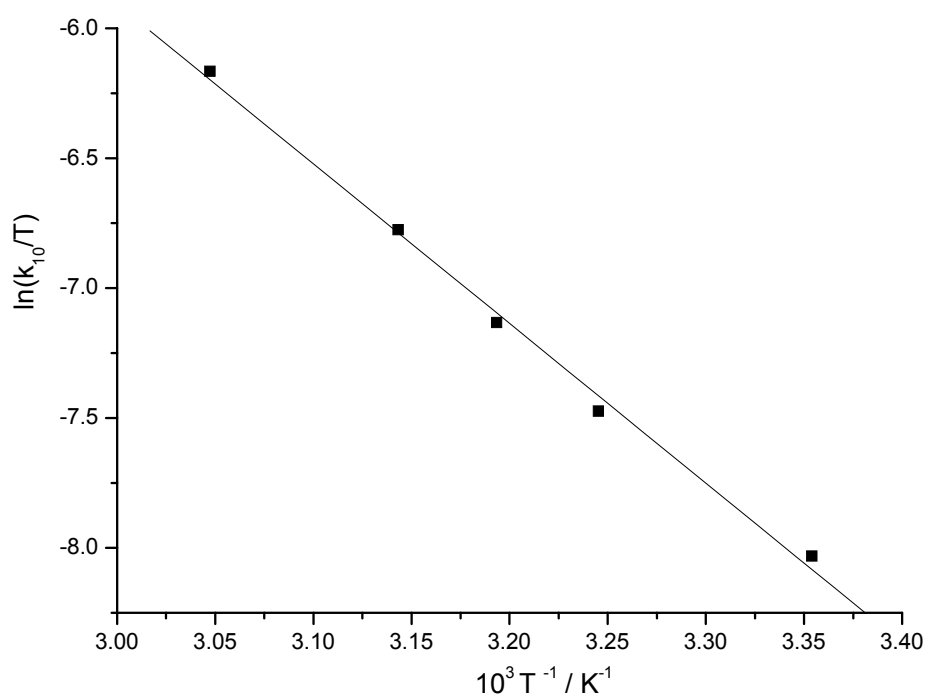

**Figure S14**



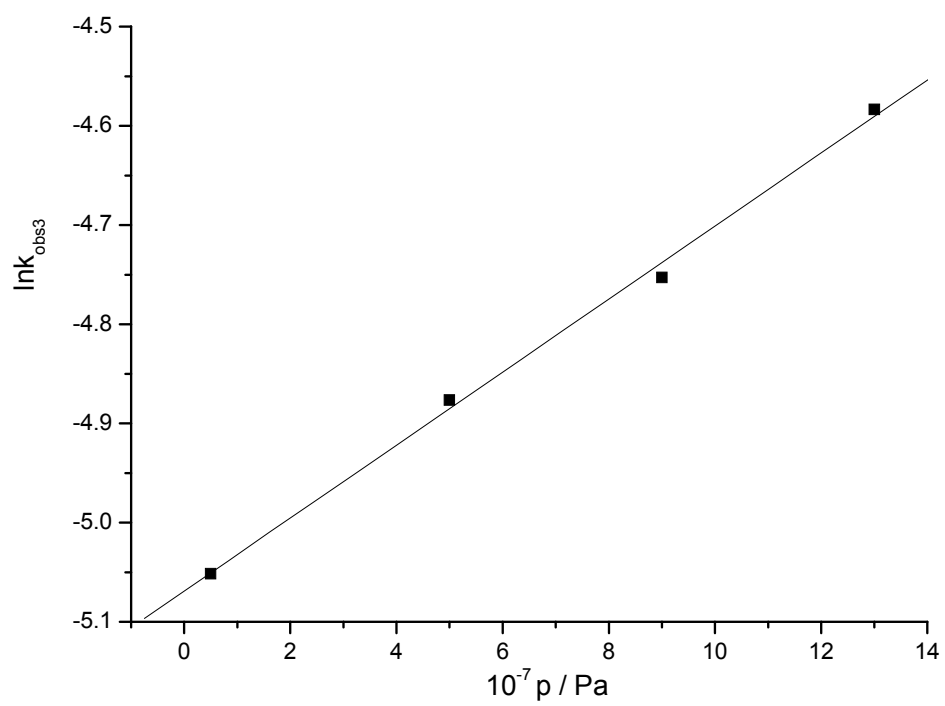

**Figure S15**

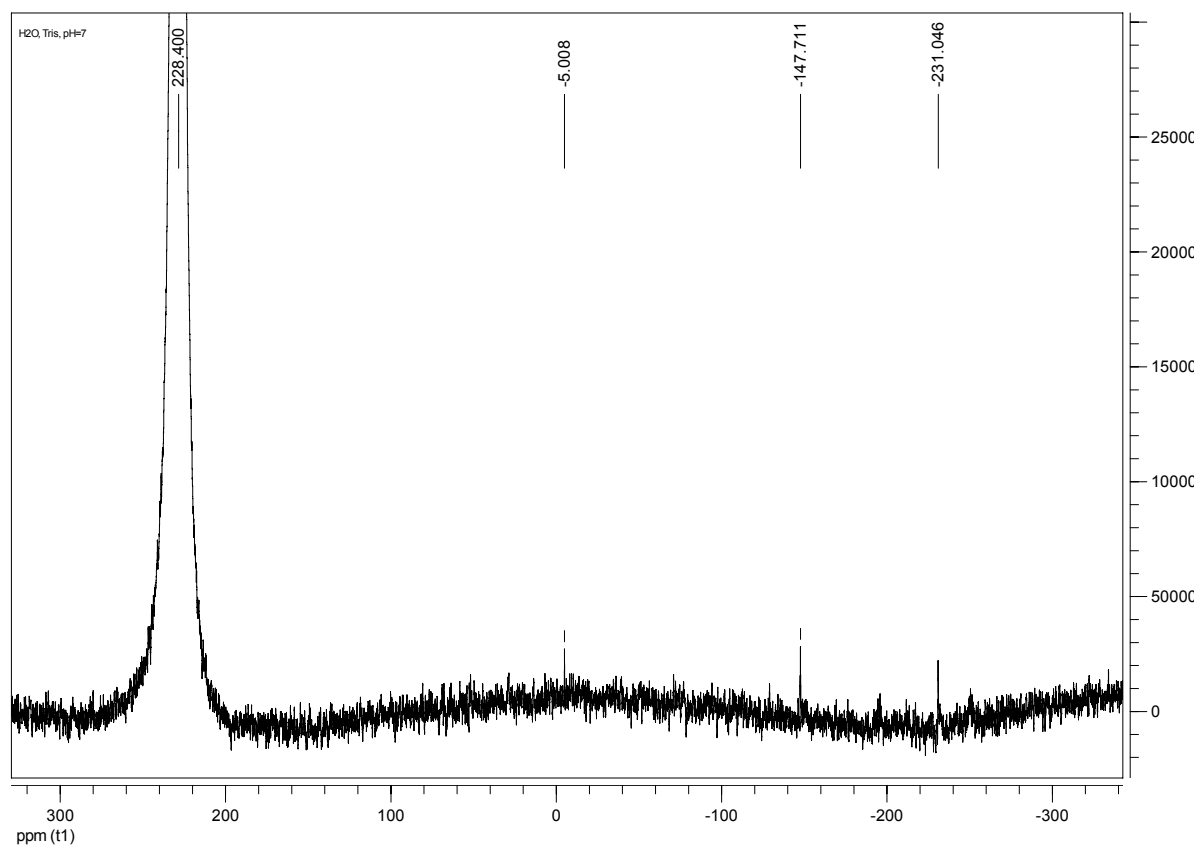

**Figure S16**
